# Supplementary material for: Achromobacter spp. genetic adaptation in cystic fibrosis
Source: PubMed Central journal article supplement (PMC8477396; doi:10.1099/mgen.0.000582), 2021-07-07
Supplement: mgen-7-0582-s001.pdf [file mgen-7-0582-s001.pdf]

**Table S1.** *Achromobacter* spp. lineages, their distribution between species and knowledge about clonal relatedness. DES—Danish epidemic strain.

| Species               | Lineage        | Number of isolates | Patient-to-patient transmission |
|-----------------------|----------------|--------------------|---------------------------------|
| <i>A. ruhlandii</i>   | P1903-AX01DK01 | 2                  | Yes (DES) <sup>a</sup>          |
| <i>A. ruhlandii</i>   | P3403-AX01DK01 | 2                  | Yes (DES) <sup>a</sup>          |
| <i>A. ruhlandii</i>   | P4203-AX01DK01 | 1                  | Yes (DES) <sup>a</sup>          |
| <i>A. ruhlandii</i>   | P4703-AX01DK01 | 1                  | Yes (DES) <sup>a</sup>          |
| <i>A. ruhlandii</i>   | P5303-AX01DK01 | 3                  | Yes (DES) <sup>a</sup>          |
| <i>A. ruhlandii</i>   | P7703-AX01DK01 | 2                  | Yes (DES) <sup>a</sup>          |
| <i>A. ruhlandii</i>   | P8703-AX01DK01 | 1                  | Yes (DES) <sup>a</sup>          |
| <i>A. ruhlandii</i>   | P9503-AX01DK01 | 3                  | Yes (DES) <sup>a</sup>          |
| <i>A. ruhlandii</i>   | P9603-AX01DK01 | 3                  | Yes (DES) <sup>a</sup>          |
| <i>A. ruhlandii</i>   | P3704-AX01DK01 | 3                  | Yes (DES) <sup>a</sup>          |
| <i>A. ruhlandii</i>   | P5604-AX01DK01 | 2                  | Yes (DES) <sup>a</sup>          |
| <i>A. ruhlandii</i>   | P6004-AX01DK01 | 1                  | Yes (DES) <sup>a</sup>          |
| <i>A. ruhlandii</i>   | P1705-AX01DK01 | 3                  | Yes (DES) <sup>a</sup>          |
| <i>A. ruhlandii</i>   | P7402-AX01DK02 | 1                  | No                              |
| <i>A. ruhlandii</i>   | P4104-AX01DK03 | 1                  | No                              |
| <i>A. insuavis</i>    | P9704-AX02DK01 | 1                  | No                              |
| <i>A. insuavis</i>    | P8504-AX02DK02 | 2                  | No                              |
| <i>A. insuavis</i>    | P9203-AX02DK03 | 1                  | No                              |
| <i>A. insuavis</i>    | P2005-AX02DK04 | 1                  | No                              |
| <i>A. insuavis</i>    | P6004-AX02DK05 | 1                  | Potentially <sup>b</sup>        |
| <i>A. insuavis</i>    | P6604-AX02DK05 | 1                  | Potentially <sup>b</sup>        |
| <i>A. insuavis</i>    | P9902-AX02DK06 | 3                  | No                              |
| <i>A. insuavis</i>    | P0802-AX02DK07 | 2                  | Potentially <sup>b</sup>        |
| <i>A. insuavis</i>    | P0603-AX02DK07 | 2                  | Potentially <sup>b</sup>        |
| <i>A. insuavis</i>    | P6203-AX02DK07 | 1                  | Potentially <sup>b</sup>        |
| <i>A. insuavis</i>    | P6203-AX02DK08 | 1                  | No                              |
| <i>A. insuavis</i>    | P5103-AX02DK09 | 1                  | No                              |
| <i>A. insuavis</i>    | P8104-AX02DK10 | 1                  | No                              |
| <i>A. xylooxidans</i> | P1700-AX03DK01 | 1                  | No                              |
| <i>A. xylooxidans</i> | P6402-AX03DK02 | 1                  | No                              |
| <i>A. xylooxidans</i> | P0703-AX03DK02 | 1                  | No                              |
| <i>A. xylooxidans</i> | P5204-AX03DK03 | 1                  | No                              |
| <i>A. xylooxidans</i> | P8605-AX03DK04 | 2                  | No                              |
| <i>A. xylooxidans</i> | P0703-AX03DK05 | 1                  | No                              |

|                          |                |   |                          |
|--------------------------|----------------|---|--------------------------|
| <i>A. xylosoxidans</i>   | P0803-AX03DK06 | 3 | No                       |
| <i>A. xylosoxidans</i>   | P0903-AX03DK07 | 1 | No                       |
| <i>A. xylosoxidans</i>   | P1703-AX03DK08 | 1 | No                       |
| <i>A. xylosoxidans</i>   | P1903-AX03DK09 | 2 | No                       |
| <i>A. xylosoxidans</i>   | P2103-AX03DK10 | 1 | No                       |
| <i>A. xylosoxidans</i>   | P3203-AX03DK11 | 4 | No                       |
| <i>A. xylosoxidans</i>   | P4203-AX03DK12 | 1 | No                       |
| <i>A. xylosoxidans</i>   | P4703-AX03DK13 | 2 | No                       |
| <i>A. xylosoxidans</i>   | P5803-AX03DK14 | 1 | No                       |
| <i>A. xylosoxidans</i>   | P6203-AX03DK15 | 1 | Potentially <sup>b</sup> |
| <i>A. xylosoxidans</i>   | P6604-AX03DK15 | 1 | Potentially <sup>b</sup> |
| <i>A. xylosoxidans</i>   | P6804-AX03DK15 | 1 | Potentially <sup>b</sup> |
| <i>A. xylosoxidans</i>   | P6203-AX03DK16 | 1 | Potentially <sup>b</sup> |
| <i>A. xylosoxidans</i>   | P7603-AX03DK16 | 3 | Potentially <sup>b</sup> |
| <i>A. xylosoxidans</i>   | P8603-AX03DK17 | 2 | No                       |
| <i>A. xylosoxidans</i>   | P9203-AX03DK18 | 2 | No                       |
| <i>A. xylosoxidans</i>   | P9403-AX03DK19 | 3 | No                       |
| <i>A. xylosoxidans</i>   | P0604-AX03DK20 | 1 | No                       |
| <i>A. xylosoxidans</i>   | P1704-AX03DK21 | 2 | No                       |
| <i>A. xylosoxidans</i>   | P3004-AX03DK22 | 1 | No                       |
| <i>A. xylosoxidans</i>   | P3504-AX03DK23 | 2 | No                       |
| <i>A. xylosoxidans</i>   | P8404-AX03DK24 | 3 | No                       |
| <i>A. xylosoxidans</i>   | P9704-AX03DK25 | 1 | No                       |
| <i>A. xylosoxidans</i>   | P2605-AX03DK26 | 1 | No                       |
| <i>A. xylosoxidans</i>   | P0610-AX03DK27 | 2 | No                       |
| <i>A. xylosoxidans</i>   | P5611-AX03DK28 | 1 | No                       |
| <i>A. xylosoxidans</i>   | P8511-AX03DK29 | 1 | No                       |
| <i>Achromobacter</i> sp. | P2202-AX04DK01 | 1 | No                       |
| <i>A. aegrifaciens</i>   | P7603-AX04DK02 | 1 | No                       |

<sup>a</sup> Ridderberg et al., 2020 [1]; <sup>b</sup> Gabrielaite *et al.*, 2021 [2].

**Table S2.** Table of publicly available RefSeq *Achromobacter* spp. sequences with original and new proposed annotations which were based on average nucleotide identity (ANI) and core genome SNP-based phylogeny.

| RefSeq ID       | Original species annotation        | ANI- and phylogeny-based species annotation |
|-----------------|------------------------------------|---------------------------------------------|
| GCF_001558755.2 | <i>Achromobacter xylosoxidans</i>  | <i>Achromobacter insuavis</i>               |
| GCF_001514355.1 | <i>Achromobacter denitrificans</i> | <i>Achromobacter ruhlandii</i>              |
| GCF_001298855.1 | <i>Achromobacter</i> sp.           | <i>Achromobacter ruhlandii</i>              |
| GCF_001299395.1 | <i>Achromobacter</i> sp.           | <i>Achromobacter ruhlandii</i>              |
| GCF_001051055.1 | <i>Achromobacter xylosoxidans</i>  | <i>Achromobacter ruhlandii</i>              |

|                 |                                   |                                   |
|-----------------|-----------------------------------|-----------------------------------|
| GCF_001558915.1 | <i>Achromobacter xylosoxidans</i> | <i>Achromobacter ruhlandii</i>    |
| GCF_001707475.1 | <i>Achromobacter xylosoxidans</i> | <i>Achromobacter ruhlandii</i>    |
| GCF_001707485.1 | <i>Achromobacter xylosoxidans</i> | <i>Achromobacter ruhlandii</i>    |
| GCF_003184165.1 | <i>Achromobacter sp.</i>          | <i>Achromobacter xylosoxidans</i> |
| GCF_001298835.1 | <i>Achromobacter sp.</i>          | <i>Achromobacter ruhlandii</i>    |
| GCF_001299135.1 | <i>Achromobacter xylosoxidans</i> | <i>Achromobacter dolens</i>       |
| GCF_001299355.1 | <i>Achromobacter sp.</i>          | <i>Achromobacter aegrifaciens</i> |
| GCF_001428165.1 | <i>Achromobacter sp.</i>          | <i>Achromobacter mucicolens</i>   |
| GCF_001975485.1 | <i>Achromobacter sp.</i>          | <i>Achromobacter mucicolens</i>   |
| GCF_003267925.1 | <i>Achromobacter sp.</i>          | <i>Achromobacter pulmonis</i>     |
| GCF_003576205.1 | <i>Achromobacter sp.</i>          | <i>Achromobacter aegrifaciens</i> |
| GCF_006715415.1 | <i>Achromobacter sp.</i>          | <i>Achromobacter mucicolens</i>   |
| GCF_000165835.1 | <i>Achromobacter xylosoxidans</i> | <i>Achromobacter sp.</i>          |
| GCF_001566985.1 | <i>Achromobacter xylosoxidans</i> | <i>Achromobacter mucicolens</i>   |
| GCF_001641525.1 | <i>Achromobacter xylosoxidans</i> | <i>Achromobacter mucicolens</i>   |
| GCF_001654705.1 | <i>Achromobacter xylosoxidans</i> | <i>Achromobacter dolens</i>       |
| GCF_003503255.1 | <i>Achromobacter xylosoxidans</i> | <i>Achromobacter sp.</i>          |
| GCF_002192695.1 | <i>Achromobacter xylosoxidans</i> | <i>Achromobacter sp.</i>          |
| GCF_002192705.1 | <i>Achromobacter xylosoxidans</i> | <i>Achromobacter sp.</i>          |
| GCF_002812705.1 | <i>Achromobacter spanius</i>      | <i>Achromobacter spanius</i>      |
| GCF_900636675.1 | <i>Achromobacter spanius</i>      | <i>Achromobacter spanius</i>      |
| GCF_900108985.1 | <i>Achromobacter sp.</i>          | <i>Achromobacter sp.</i>          |
| GCF_900156745.1 | <i>Achromobacter sp.</i>          | <i>Achromobacter sp.</i>          |
| GCF_001189595.1 | <i>Achromobacter sp.</i>          | <i>Achromobacter sp.</i>          |
| GCF_003994415.1 | <i>Achromobacter spanius</i>      | <i>Achromobacter sp.</i>          |
| GCF_001005835.2 | <i>Achromobacter sp.</i>          | <i>Achromobacter sp.</i>          |
| GCF_002926155.1 | <i>Achromobacter spanius</i>      | <i>Achromobacter sp.</i>          |
| GCF_003600685.1 | <i>Achromobacter sp.</i>          | <i>Achromobacter sp.</i>          |
| GCF_001427425.1 | <i>Achromobacter sp.</i>          | <i>Achromobacter sp.</i>          |
| GCF_002966795.1 | <i>Achromobacter spanius</i>      | <i>Achromobacter sp.</i>          |
| GCF_002209485.1 | <i>Achromobacter sp.</i>          | <i>Achromobacter sp.</i>          |
| GCF_002209495.1 | <i>Achromobacter sp.</i>          | <i>Achromobacter sp.</i>          |
| GCF_001298975.1 | <i>Achromobacter sp.</i>          | <i>Achromobacter insuavis</i>     |
| GCF_001299435.1 | <i>Achromobacter sp.</i>          | <i>Achromobacter insuavis</i>     |
| GCF_001298995.1 | <i>Achromobacter sp.</i>          | <i>Achromobacter insuavis</i>     |
| GCF_001299375.1 | <i>Achromobacter sp.</i>          | <i>Achromobacter insuavis</i>     |
| GCF_003096315.1 | <i>Achromobacter insuavis</i>     | <i>Achromobacter insuavis</i>     |
| GCF_000219745.1 | <i>Achromobacter insuavis</i>     | <i>Achromobacter insuavis</i>     |
| GCF_001637085.1 | <i>Achromobacter ruhlandii</i>    | <i>Achromobacter ruhlandii</i>    |
| GCF_001637095.1 | <i>Achromobacter ruhlandii</i>    | <i>Achromobacter ruhlandii</i>    |

|                 |                                   |                                   |
|-----------------|-----------------------------------|-----------------------------------|
| GCF_001637105.1 | <i>Achromobacter ruhlandii</i>    | <i>Achromobacter ruhlandii</i>    |
| GCF_001637115.1 | <i>Achromobacter ruhlandii</i>    | <i>Achromobacter ruhlandii</i>    |
| GCF_002082135.1 | <i>Achromobacter ruhlandii</i>    | <i>Achromobacter ruhlandii</i>    |
| GCF_002799605.1 | <i>Achromobacter ruhlandii</i>    | <i>Achromobacter ruhlandii</i>    |
| GCF_002803005.1 | <i>Achromobacter ruhlandii</i>    | <i>Achromobacter ruhlandii</i>    |
| GCF_000517225.1 | <i>Achromobacter xylosoxidans</i> | <i>Achromobacter xylosoxidans</i> |
| GCF_000967095.2 | <i>Achromobacter xylosoxidans</i> | <i>Achromobacter xylosoxidans</i> |
| GCF_001038045.1 | <i>Achromobacter xylosoxidans</i> | <i>Achromobacter xylosoxidans</i> |
| GCF_001057595.1 | <i>Achromobacter xylosoxidans</i> | <i>Achromobacter xylosoxidans</i> |
| GCF_001057605.1 | <i>Achromobacter xylosoxidans</i> | <i>Achromobacter xylosoxidans</i> |
| GCF_001275845.1 | <i>Achromobacter xylosoxidans</i> | <i>Achromobacter xylosoxidans</i> |
| GCF_001275865.1 | <i>Achromobacter xylosoxidans</i> | <i>Achromobacter xylosoxidans</i> |
| GCF_001275875.1 | <i>Achromobacter xylosoxidans</i> | <i>Achromobacter xylosoxidans</i> |
| GCF_001276005.1 | <i>Achromobacter xylosoxidans</i> | <i>Achromobacter xylosoxidans</i> |
| GCF_001276025.1 | <i>Achromobacter xylosoxidans</i> | <i>Achromobacter xylosoxidans</i> |
| GCF_001276035.1 | <i>Achromobacter xylosoxidans</i> | <i>Achromobacter xylosoxidans</i> |
| GCF_001276315.1 | <i>Achromobacter xylosoxidans</i> | <i>Achromobacter xylosoxidans</i> |
| GCF_001298795.1 | <i>Achromobacter xylosoxidans</i> | <i>Achromobacter xylosoxidans</i> |
| GCF_001298895.1 | <i>Achromobacter xylosoxidans</i> | <i>Achromobacter xylosoxidans</i> |
| GCF_001298915.1 | <i>Achromobacter xylosoxidans</i> | <i>Achromobacter xylosoxidans</i> |
| GCF_001298935.1 | <i>Achromobacter xylosoxidans</i> | <i>Achromobacter xylosoxidans</i> |
| GCF_001299015.1 | <i>Achromobacter xylosoxidans</i> | <i>Achromobacter xylosoxidans</i> |
| GCF_001299035.1 | <i>Achromobacter xylosoxidans</i> | <i>Achromobacter xylosoxidans</i> |
| GCF_001299055.1 | <i>Achromobacter xylosoxidans</i> | <i>Achromobacter xylosoxidans</i> |
| GCF_001299095.1 | <i>Achromobacter xylosoxidans</i> | <i>Achromobacter xylosoxidans</i> |
| GCF_001299115.1 | <i>Achromobacter xylosoxidans</i> | <i>Achromobacter xylosoxidans</i> |
| GCF_001299155.1 | <i>Achromobacter xylosoxidans</i> | <i>Achromobacter xylosoxidans</i> |
| GCF_001299175.1 | <i>Achromobacter xylosoxidans</i> | <i>Achromobacter xylosoxidans</i> |
| GCF_001299195.1 | <i>Achromobacter xylosoxidans</i> | <i>Achromobacter xylosoxidans</i> |
| GCF_001299215.1 | <i>Achromobacter xylosoxidans</i> | <i>Achromobacter xylosoxidans</i> |
| GCF_001299235.1 | <i>Achromobacter xylosoxidans</i> | <i>Achromobacter xylosoxidans</i> |
| GCF_001299265.1 | <i>Achromobacter xylosoxidans</i> | <i>Achromobacter xylosoxidans</i> |
| GCF_001299295.1 | <i>Achromobacter xylosoxidans</i> | <i>Achromobacter xylosoxidans</i> |
| GCF_001299335.1 | <i>Achromobacter xylosoxidans</i> | <i>Achromobacter xylosoxidans</i> |
| GCF_001299415.1 | <i>Achromobacter xylosoxidans</i> | <i>Achromobacter xylosoxidans</i> |
| GCF_001471535.2 | <i>Achromobacter xylosoxidans</i> | <i>Achromobacter xylosoxidans</i> |
| GCF_001541435.1 | <i>Achromobacter xylosoxidans</i> | <i>Achromobacter xylosoxidans</i> |
| GCF_001559195.1 | <i>Achromobacter xylosoxidans</i> | <i>Achromobacter xylosoxidans</i> |
| GCF_001598595.1 | <i>Achromobacter xylosoxidans</i> | <i>Achromobacter xylosoxidans</i> |
| GCF_001807115.1 | <i>Achromobacter xylosoxidans</i> | <i>Achromobacter xylosoxidans</i> |

|                 |                                     |                                     |
|-----------------|-------------------------------------|-------------------------------------|
| GCF_001810925.1 | <i>Achromobacter xylosoxidans</i>   | <i>Achromobacter xylosoxidans</i>   |
| GCF_001813885.1 | <i>Achromobacter xylosoxidans</i>   | <i>Achromobacter xylosoxidans</i>   |
| GCF_001815425.1 | <i>Achromobacter xylosoxidans</i>   | <i>Achromobacter xylosoxidans</i>   |
| GCF_001815885.1 | <i>Achromobacter xylosoxidans</i>   | <i>Achromobacter xylosoxidans</i>   |
| GCF_001957045.1 | <i>Achromobacter xylosoxidans</i>   | <i>Achromobacter xylosoxidans</i>   |
| GCF_001957055.1 | <i>Achromobacter xylosoxidans</i>   | <i>Achromobacter xylosoxidans</i>   |
| GCF_001957065.1 | <i>Achromobacter xylosoxidans</i>   | <i>Achromobacter xylosoxidans</i>   |
| GCF_002083165.2 | <i>Achromobacter xylosoxidans</i>   | <i>Achromobacter xylosoxidans</i>   |
| GCF_003031105.1 | <i>Achromobacter xylosoxidans</i>   | <i>Achromobacter xylosoxidans</i>   |
| GCF_003177325.1 | <i>Achromobacter xylosoxidans</i>   | <i>Achromobacter xylosoxidans</i>   |
| GCF_003293615.1 | <i>Achromobacter xylosoxidans</i>   | <i>Achromobacter xylosoxidans</i>   |
| GCF_008432465.1 | <i>Achromobacter xylosoxidans</i>   | <i>Achromobacter xylosoxidans</i>   |
| GCF_008631215.1 | <i>Achromobacter xylosoxidans</i>   | <i>Achromobacter xylosoxidans</i>   |
| GCF_900475575.1 | <i>Achromobacter xylosoxidans</i>   | <i>Achromobacter xylosoxidans</i>   |
| GCF_902363095.1 | <i>Achromobacter xylosoxidans</i>   | <i>Achromobacter xylosoxidans</i>   |
| GCF_000186185.1 | <i>Achromobacter xylosoxidans</i>   | <i>Achromobacter xylosoxidans</i>   |
| GCF_001457475.1 | <i>Achromobacter xylosoxidans</i>   | <i>Achromobacter xylosoxidans</i>   |
| GCF_003939885.1 | <i>Achromobacter aegrifaciens</i>   | <i>Achromobacter aegrifaciens</i>   |
| GCF_900496965.1 | <i>Achromobacter agilis</i>         | <i>Achromobacter agilis</i>         |
| GCF_004121055.1 | <i>Achromobacter aloeverae</i>      | <i>Achromobacter aloeverae</i>      |
| GCF_000236785.1 | <i>Achromobacter arsenitoxydans</i> | <i>Achromobacter arsenitoxydans</i> |
| GCF_001571365.1 | <i>Achromobacter denitrificans</i>  | <i>Achromobacter denitrificans</i>  |
| GCF_001945385.1 | <i>Achromobacter denitrificans</i>  | <i>Achromobacter denitrificans</i>  |
| GCF_002192685.1 | <i>Achromobacter denitrificans</i>  | <i>Achromobacter denitrificans</i>  |
| GCF_002205315.1 | <i>Achromobacter denitrificans</i>  | <i>Achromobacter denitrificans</i>  |
| GCF_003812265.1 | <i>Achromobacter denitrificans</i>  | <i>Achromobacter denitrificans</i>  |
| GCF_003939895.1 | <i>Achromobacter denitrificans</i>  | <i>Achromobacter denitrificans</i>  |
| GCF_900444675.1 | <i>Achromobacter denitrificans</i>  | <i>Achromobacter denitrificans</i>  |
| GCF_003096295.1 | <i>Achromobacter dolens</i>         | <i>Achromobacter dolens</i>         |
| GCF_007655095.1 | <i>Achromobacter dolens</i>         | <i>Achromobacter dolens</i>         |
| GCF_000783435.2 | <i>Achromobacter insolitus</i>      | <i>Achromobacter insolitus</i>      |
| GCF_001639685.1 | <i>Achromobacter insolitus</i>      | <i>Achromobacter insolitus</i>      |
| GCF_001641515.1 | <i>Achromobacter insolitus</i>      | <i>Achromobacter insolitus</i>      |
| GCF_001707465.1 | <i>Achromobacter insolitus</i>      | <i>Achromobacter insolitus</i>      |
| GCF_001971645.1 | <i>Achromobacter insolitus</i>      | <i>Achromobacter insolitus</i>      |
| GCF_002209555.1 | <i>Achromobacter insolitus</i>      | <i>Achromobacter insolitus</i>      |
| GCF_003293535.1 | <i>Achromobacter insolitus</i>      | <i>Achromobacter insolitus</i>      |
| GCF_008245125.1 | <i>Achromobacter insolitus</i>      | <i>Achromobacter insolitus</i>      |
| GCF_900637265.1 | <i>Achromobacter insolitus</i>      | <i>Achromobacter insolitus</i>      |
| GCF_000286415.1 | <i>Achromobacter marplatensis</i>   | <i>Achromobacter marplatensis</i>   |

|                 |                                   |                                   |
|-----------------|-----------------------------------|-----------------------------------|
| GCF_002209535.1 | <i>Achromobacter marplatensis</i> | <i>Achromobacter marplatensis</i> |
| GCF_003315095.1 | <i>Achromobacter marplatensis</i> | <i>Achromobacter marplatensis</i> |
| GCF_003053425.1 | <i>Achromobacter mucicolens</i>   | <i>Achromobacter mucicolens</i>   |
| GCF_000164035.1 | <i>Achromobacter piechaudii</i>   | <i>Achromobacter piechaudii</i>   |
| GCF_001262515.1 | <i>Achromobacter piechaudii</i>   | <i>Achromobacter piechaudii</i>   |
| GCF_001571245.1 | <i>Achromobacter piechaudii</i>   | <i>Achromobacter piechaudii</i>   |
| GCF_002885955.2 | <i>Achromobacter pulmonis</i>     | <i>Achromobacter pulmonis</i>     |
| GCF_000633435.1 | <i>Achromobacter sp.</i>          | <i>Achromobacter sp.</i>          |
| GCF_000757485.1 | <i>Achromobacter sp.</i>          | <i>Achromobacter sp.</i>          |
| GCF_001270295.1 | <i>Achromobacter sp.</i>          | <i>Achromobacter sp.</i>          |
| GCF_001298955.1 | <i>Achromobacter sp.</i>          | <i>Achromobacter sp.</i>          |
| GCF_001299315.1 | <i>Achromobacter sp.</i>          | <i>Achromobacter sp.</i>          |
| GCF_001428845.1 | <i>Achromobacter sp.</i>          | <i>Achromobacter sp.</i>          |
| GCF_002902905.1 | <i>Achromobacter sp.</i>          | <i>Achromobacter sp.</i>          |
| GCF_002975275.1 | <i>Achromobacter sp.</i>          | <i>Achromobacter sp.</i>          |
| GCF_900496975.1 | <i>Achromobacter sp.</i>          | <i>Achromobacter sp.</i>          |

**Table S3.** List of most frequently mutated genes in *Achromobacter ruhlandii*, *Achromobacter insuavis* and *Achromobacter xylosoxidans* with their Clusters of Orthologous Groups (COG) function, corresponding E-value, gene description and gene relatedness to antibiotic resistance or virulence with references defining gene's relatedness to antibiotic resistance or virulence are provided where relevant.

| Species             | E-value (COG function) | COG function | Number of times the gene was mutated | Gene          | Gene description                           | Virulence gene (ABRicate) | Antibiotic resistance gene (ABRicate) | Reference                                                                                                                                                                      |
|---------------------|------------------------|--------------|--------------------------------------|---------------|--------------------------------------------|---------------------------|---------------------------------------|--------------------------------------------------------------------------------------------------------------------------------------------------------------------------------|
| <i>A. ruhlandii</i> | 0                      | P            | 5                                    | Axylo_RS04995 | magnesium-translocating P-type ATPase      | No                        | Yes                                   | <a href="https://jb.asm.org/content/190/14/4951.short">https://jb.asm.org/content/190/14/4951.short</a>                                                                        |
| <i>A. ruhlandii</i> | 0                      | T            | 5                                    | Axylo_RS05365 | sensor histidine kinase KdpD               | Yes                       | No                                    | <a href="https://journals.plos.org/plospathogens/article?id=10.1371/journal.ppat.1003201">https://journals.plos.org/plospathogens/article?id=10.1371/journal.ppat.1003201;</a> |
| <i>A. ruhlandii</i> | 1.70E-233              | E            | 5                                    | Axylo_RS05465 | amino acid deaminase                       | No                        | No                                    |                                                                                                                                                                                |
| <i>A. ruhlandii</i> | 5.70E-113              | K            | 5                                    | Axylo_RS06040 | DNA-binding transcriptional repressor AxyZ | No                        | Yes                                   | <a href="https://aac.asm.org/content/61/8/e00290-17.short">https://aac.asm.org/content/61/8/e00290-17.short</a>                                                                |
| <i>A. ruhlandii</i> | 0                      | M            | 5                                    | Axylo_RS07110 | cyanophycin synthetase                     | Yes                       | No                                    | <a href="https://iai.asm.org/content/81/8/2800.short">https://iai.asm.org/content/81/8/2800.short</a>                                                                          |

|                     |           |   |   |               |                                                                          |     |     |                                                                                                                                                                         |
|---------------------|-----------|---|---|---------------|--------------------------------------------------------------------------|-----|-----|-------------------------------------------------------------------------------------------------------------------------------------------------------------------------|
| <i>A. ruhlandii</i> | 0         | L | 5 | Axylo_RS07320 | DNA gyrase subunit A                                                     | No  | Yes | <a href="https://academic.oup.com/febsle/article/143/1/25/663481">https://academic.oup.com/febsle/article/143/1/25/663481</a>                                           |
| <i>A. ruhlandii</i> | 3.30E-154 | K | 5 | Axylo_RS08030 | LysR family transcriptional regulator MetR                               | Yes | No  | <a href="https://mbio.asm.org/content/3/5/e00236-12.short">https://mbio.asm.org/content/3/5/e00236-12.short</a>                                                         |
| <i>A. ruhlandii</i> | 4.70E-159 | U | 5 | Axylo_RS08655 | MotA/TolQ/ExbB proton channel family protein                             | Yes | No  | <a href="https://www.nature.com/articles/s41598-017-01551-4">https://www.nature.com/articles/s41598-017-01551-4</a>                                                     |
| <i>A. ruhlandii</i> | 3.30E-240 | T | 5 | Axylo_RS09825 | HAMP domain-containing protein                                           | No  | No  |                                                                                                                                                                         |
| <i>A. ruhlandii</i> | 0         | S | 5 | Axylo_RS11620 | Inner membrane component of tripartite multidrug resistance system       | No  | Yes | <a href="https://www.ncbi.nlm.nih.gov/pmc/articles/PMC4543513/">https://www.ncbi.nlm.nih.gov/pmc/articles/PMC4543513/</a>                                               |
| <i>A. ruhlandii</i> | 1.70E-256 | M | 5 | Axylo_RS11635 | efflux transporter, outer membrane factor (OMF) lipoprotein, NodT family | No  | Yes | <a href="https://journals.plos.org/plosone/article?id=10.1371/journal.pone.0068484">https://journals.plos.org/plosone/article?id=10.1371/journal.pone.0068484</a>       |
| <i>A. ruhlandii</i> | 1.40E-243 | T | 5 | Axylo_RS14635 | two-component sensor histidine kinase                                    | No  | No  |                                                                                                                                                                         |
| <i>A. ruhlandii</i> | 0         | P | 5 | Axylo_RS17180 | multidrug efflux RND transporter permease                                | No  | Yes | <a href="https://www.ncbi.nlm.nih.gov/Structure/sparcle/archview.html?archid=11489960">https://www.ncbi.nlm.nih.gov/Structure/sparcle/archview.html?archid=11489960</a> |
| <i>A. ruhlandii</i> | 6.40E-257 | T | 5 | Axylo_RS17980 | sensor domain-containing diguanylate cyclase                             | No  | No  |                                                                                                                                                                         |
| <i>A. ruhlandii</i> | 1.80E-180 | G | 5 | Axylo_RS19155 | DHA2 family efflux MFS transporter permease subunit                      | No  | Yes | <a href="https://www.ncbi.nlm.nih.gov/genome/annotation_prok/evidence/TIGR00711/">https://www.ncbi.nlm.nih.gov/genome/annotation_prok/evidence/TIGR00711/</a>           |
| <i>A. ruhlandii</i> | 0         | V | 5 | Axylo_RS23025 | ribosome-associated ATPase/putative transporter RbbA                     | No  | Yes | <a href="https://www.ncbi.nlm.nih.gov/pmc/articles/PMC3083400/">https://www.ncbi.nlm.nih.gov/pmc/articles/PMC3083400/</a>                                               |
| <i>A. ruhlandii</i> | 0         | S | 5 | Axylo_RS23830 | WG repeat-containing protein                                             | No  | No  |                                                                                                                                                                         |
| <i>A. ruhlandii</i> | 2.60E-285 | M | 6 | Axylo_RS03970 | penicillin-binding protein 2                                             | No  | Yes | <a href="https://www.ncbi.nlm.nih.gov/Structure/sparcle/archview.html?archid=11433609">https://www.ncbi.nlm.nih.gov/Structure/sparcle/archview.html?archid=11433609</a> |
| <i>A. ruhlandii</i> | 1.10E-69  | V | 6 | Axylo_RS05925 | AXC family carbapenem-hydrolyzing class A beta-lactamase                 | No  | Yes | <a href="https://www.ncbi.nlm.nih.gov/genome/annotation_prok/evidence/NF033929/">https://www.ncbi.nlm.nih.gov/genome/annotation_prok/evidence/NF033929/</a>             |
| <i>A. ruhlandii</i> | 0         | P | 6 | Axylo_RS06975 | TonB-dependent siderophore receptor                                      | Yes | No  | <a href="https://academic.oup.com/febsre/article/38/4/569/755321">https://academic.oup.com/febsre/article/38/4/569/755321</a>                                           |
| <i>A. ruhlandii</i> | 5.40E-199 | E | 6 | Axylo_RS08835 | polyamine ABC transporter ATP-binding protein                            | No  | No  |                                                                                                                                                                         |
| <i>A. ruhlandii</i> | 0         | T | 6 | Axylo_RS10450 | hybrid sensor histidine kinase/response regulator                        | No  | No  |                                                                                                                                                                         |

|                     |           |     |   |               |                                                                |     |     |                                                                                                                                                                         |
|---------------------|-----------|-----|---|---------------|----------------------------------------------------------------|-----|-----|-------------------------------------------------------------------------------------------------------------------------------------------------------------------------|
| <i>A. ruhlandii</i> | 0         | U   | 6 | Axylo_RS12535 | filamentous hemagglutinin N-terminal domain-containing protein | Yes | No  | <a href="https://mbio.asm.org/content/6/4/e01189-15.short">https://mbio.asm.org/content/6/4/e01189-15.short</a>                                                         |
| <i>A. ruhlandii</i> | 0         | P   | 6 | Axylo_RS21160 | TonB-dependent hemin, ferrichrome receptor                     | Yes | No  | <a href="https://www.mdpi.com/2073-4425/7/12/126/htm">https://www.mdpi.com/2073-4425/7/12/126/htm</a>                                                                   |
| <i>A. ruhlandii</i> | 0         | T   | 6 | Axylo_RS22105 | response regulator                                             | No  | No  |                                                                                                                                                                         |
| <i>A. ruhlandii</i> | 0         | U   | 5 | Axylo_RS25190 | ShlB/FhaC/HecB family hemolysin secretion/activation protein   | Yes | No  | <a href="https://www.tandfonline.com/doi/full/10.1080/21505594.2016.1262313">https://www.tandfonline.com/doi/full/10.1080/21505594.2016.1262313</a>                     |
| <i>A. ruhlandii</i> | -         | -   | 7 | Axylo_RS26755 | pseudogene                                                     | No  | No  |                                                                                                                                                                         |
| <i>A. insuavis</i>  | 5.80E-113 | K   | 2 | AL504_RS00240 | MarR family transcriptional regulator                          | No  | Yes | <a href="https://www.ncbi.nlm.nih.gov/Structure/sparcle/archview.html?archid=12204203">https://www.ncbi.nlm.nih.gov/Structure/sparcle/archview.html?archid=12204203</a> |
| <i>A. insuavis</i>  | 2.70E-115 | P   | 2 | AL504_RS02460 | taurine import ATP-binding protein TauB                        | No  | No  |                                                                                                                                                                         |
| <i>A. insuavis</i>  | 0         | P   | 2 | AL504_RS03095 | chloride channel protein                                       | No  | No  |                                                                                                                                                                         |
| <i>A. insuavis</i>  | 2.80E-280 | E   | 2 | AL504_RS12045 | leucyl aminopeptidase                                          | No  | No  |                                                                                                                                                                         |
| <i>A. insuavis</i>  | 2.20E-194 | D   | 2 | AL504_RS12415 | membrane protein                                               | No  | No  |                                                                                                                                                                         |
| <i>A. insuavis</i>  | 1.40E-114 | K   | 2 | AL504_RS12625 | DNA-binding transcriptional repressor AxyZ                     | No  | Yes | <a href="https://aac.asm.org/content/61/8/e00290-17.short">https://aac.asm.org/content/61/8/e00290-17.short</a>                                                         |
| <i>A. insuavis</i>  | 1.80E-224 | P   | 2 | AL504_RS15290 | hypothetical protein                                           | No  | No  |                                                                                                                                                                         |
| <i>A. insuavis</i>  | -         | -   | 2 | AL504_RS15295 | hypothetical protein                                           | No  | No  |                                                                                                                                                                         |
| <i>A. insuavis</i>  | 0         | L   | 2 | AL504_RS15960 | DUF342 domain-containing protein                               | No  | No  |                                                                                                                                                                         |
| <i>A. insuavis</i>  | 8.20E-166 | O   | 2 | AL504_RS17075 | NAD(P)/FAD-dependent oxidoreductase                            | No  | No  |                                                                                                                                                                         |
| <i>A. insuavis</i>  | 0         | J   | 2 | AL504_RS19685 | elongation factor G                                            | No  | Yes | <a href="https://onlinelibrary.wiley.com/doi/epdf/10.1002/pmic.200500112">https://onlinelibrary.wiley.com/doi/epdf/10.1002/pmic.200500112</a>                           |
| <i>A. insuavis</i>  | 1.50E-253 | J   | 2 | AL504_RS21310 | 16S rRNA (cytosine(967)-C(5))-methyltransferase RsmB           | No  | No  |                                                                                                                                                                         |
| <i>A. insuavis</i>  | 3.00E-266 | G   | 2 | AL504_RS22030 | MFS transporter                                                | No  | Yes | <a href="https://www.ncbi.nlm.nih.gov/Structure/sparcle/archview.html?archid=13022956">https://www.ncbi.nlm.nih.gov/Structure/sparcle/archview.html?archid=13022956</a> |
| <i>A. insuavis</i>  | 0         | E   | 2 | AL504_RS22980 | lysine decarboxylase                                           | Yes | No  | <a href="https://www.sciencedirect.com/science/article/abs/pii/S0969212619303442">https://www.sciencedirect.com/science/article/abs/pii/S0969212619303442</a>           |
| <i>A. insuavis</i>  | 0         | L   | 2 | AL504_RS27775 | DNA mismatch repair protein MutS                               | No  | No  |                                                                                                                                                                         |
| <i>A. insuavis</i>  | 0         | M,U | 3 | AL504_RS04195 | hypothetical protein                                           | Yes | No  | <a href="https://www.sciencedirect.com/science/article/abs/pii/S1438422100801022">https://www.sciencedirect.com/science/article/abs/pii/S1438422100801022</a>           |



|                        |           |   |   |               |                                                                                           |     |     |                                                                                                                                                                         |
|------------------------|-----------|---|---|---------------|-------------------------------------------------------------------------------------------|-----|-----|-------------------------------------------------------------------------------------------------------------------------------------------------------------------------|
| <i>A. xylosoxidans</i> | 4.10E-97  | - | 3 | AT699_RS01280 | hypothetical protein                                                                      | No  | No  |                                                                                                                                                                         |
| <i>A. xylosoxidans</i> | 4.00E-165 | O | 3 | AT699_RS01870 | NAD(P)/FAD-dependent oxidoreductase                                                       | No  | No  |                                                                                                                                                                         |
| <i>A. xylosoxidans</i> | 6.40E-156 | S | 3 | AT699_RS05145 | tripartite tricarboxylate transporter substrate binding protein BugD                      | No  | No  |                                                                                                                                                                         |
| <i>A. xylosoxidans</i> | 2.50E-108 | M | 3 | AT699_RS06160 | outer membrane lipoprotein chaperone LolA                                                 | No  | No  |                                                                                                                                                                         |
| <i>A. xylosoxidans</i> | 1.10E-111 | K | 3 | AT699_RS06735 | DNA-binding transcriptional repressor AxyZ                                                | No  | Yes | <a href="https://aac.asm.org/content/61/8/e00290-17.short">https://aac.asm.org/content/61/8/e00290-17.short</a>                                                         |
| <i>A. xylosoxidans</i> | 5.70E-210 | I | 3 | AT699_RS07205 | beta-ketoacyl-ACP synthase II                                                             | No  | No  |                                                                                                                                                                         |
| <i>A. xylosoxidans</i> | 0         | P | 3 | AT699_RS11865 | multidrug efflux RND transporter permease                                                 | No  | Yes | <a href="https://www.ncbi.nlm.nih.gov/Structure/sparcle/archview.html?archid=11489960">https://www.ncbi.nlm.nih.gov/Structure/sparcle/archview.html?archid=11489960</a> |
| <i>A. xylosoxidans</i> | 0         | S | 3 | AT699_RS12875 | AAA family ATPase                                                                         | No  | No  |                                                                                                                                                                         |
| <i>A. xylosoxidans</i> | 0         | F | 3 | AT699_RS13295 | bifunctional (p)ppGpp synthetase/guanosine-3',5'-bis(diphosphate) 3'-pyrophosphohydrolase | No  | No  |                                                                                                                                                                         |
| <i>A. xylosoxidans</i> | 4.00E-260 | Q | 3 | AT699_RS14700 | SidA/IucD/PvdA family monooxygenase                                                       | Yes | No  | <a href="https://onlinelibrary.wiley.com/doi/full/10.1002/mbo3.804">https://onlinelibrary.wiley.com/doi/full/10.1002/mbo3.804</a>                                       |
| <i>A. xylosoxidans</i> | 4.00E-90  | T | 3 | AT699_RS18500 | low molecular weight phosphotyrosine protein phosphatase                                  | No  | No  |                                                                                                                                                                         |
| <i>A. xylosoxidans</i> | 2.40E-151 | K | 3 | AT699_RS21090 | IciR family transcriptional regulator                                                     | Yes | No  | <a href="https://www.ncbi.nlm.nih.gov/Structure/sparcle/archview.html?archid=11444403">https://www.ncbi.nlm.nih.gov/Structure/sparcle/archview.html?archid=11444403</a> |
| <i>A. xylosoxidans</i> | 2.40E-238 | T | 3 | AT699_RS22580 | HAMP domain-containing protein                                                            | No  | No  |                                                                                                                                                                         |
| <i>A. xylosoxidans</i> | 0         | P | 3 | AT699_RS25090 | TonB-dependent hemin, ferrichrome receptor                                                | Yes | No  | <a href="https://www.mdpi.com/2073-4425/7/12/126/html">https://www.mdpi.com/2073-4425/7/12/126/html</a>                                                                 |
| <i>A. xylosoxidans</i> | 2.00E-164 | K | 3 | AT699_RS29085 | LysR family transcriptional regulator                                                     | Yes | No  | <a href="https://www.ncbi.nlm.nih.gov/Structure/sparcle/archview.html?archid=10444056">https://www.ncbi.nlm.nih.gov/Structure/sparcle/archview.html?archid=10444056</a> |
| <i>A. xylosoxidans</i> | 7.80E-53  | K | 3 | AT699_RS29425 | helix-turn-helix transcriptional regulator                                                | No  | No  |                                                                                                                                                                         |
| <i>A. xylosoxidans</i> | 7.40E-162 | E | 3 | AT699_RS30730 | pyridoxal-phosphate dependent enzyme                                                      | No  | No  |                                                                                                                                                                         |
| <i>A. xylosoxidans</i> | 9.00E-215 | P | 3 | AT699_RS30735 | catalase                                                                                  | No  | No  |                                                                                                                                                                         |
| <i>A. xylosoxidans</i> | 0         | L | 4 | AT699_RS00345 | DNA topoisomerase III                                                                     | No  | Yes | <a href="https://academic.oup.com/febs/article/67/3/159/2398791">https://academic.oup.com/febs/article/67/3/159/2398791</a>                                             |

|                        |           |   |   |               |                                           |     |     |                                                                                                                                                                         |
|------------------------|-----------|---|---|---------------|-------------------------------------------|-----|-----|-------------------------------------------------------------------------------------------------------------------------------------------------------------------------|
| <i>A. xylosoxidans</i> | 3.60E-287 | M | 4 | AT699_RS03990 | penicillin-binding protein 2              | No  | Yes | <a href="https://www.ncbi.nlm.nih.gov/Structure/sparcle/archview.html?archid=11433609">https://www.ncbi.nlm.nih.gov/Structure/sparcle/archview.html?archid=11433609</a> |
| <i>A. xylosoxidans</i> | 2.00E-167 | K | 4 | AT699_RS11855 | LysR family transcriptional regulator     | Yes | No  | <a href="https://onlinelibrary.wiley.com/doi/full/10.1111/j.1365-2958.2006.05269.x">https://onlinelibrary.wiley.com/doi/full/10.1111/j.1365-2958.2006.05269.x</a>       |
| <i>A. xylosoxidans</i> | 1.10E-263 | T | 4 | AT699_RS15300 | HAMP domain-containing histidine kinase   | Yes | No  | <a href="https://www.embopress.org/doi/full/10.1093/emboj/cdg159">https://www.embopress.org/doi/full/10.1093/emboj/cdg159</a>                                           |
| <i>A. xylosoxidans</i> | 1.20E-95  | T | 4 | AT699_RS25225 | response regulator transcription factor   | No  | No  |                                                                                                                                                                         |
| <i>A. xylosoxidans</i> | 3.60E-234 | T | 4 | AT699_RS26600 | HAMP domain-containing histidine kinase   | Yes | No  | <a href="https://www.embopress.org/doi/full/10.1093/emboj/cdg159">https://www.embopress.org/doi/full/10.1093/emboj/cdg159</a>                                           |
| <i>A. xylosoxidans</i> | 0         | S | 4 | AT699_RS26820 | hypothetical protein                      | No  | No  |                                                                                                                                                                         |
| <i>A. xylosoxidans</i> | 6.90E-205 | S | 5 | AT699_RS03090 | LPS export ABC transporter permease LptG  | No  | Yes | <a href="https://onlinelibrary.wiley.com/doi/full/10.1002/mbo3.844">https://onlinelibrary.wiley.com/doi/full/10.1002/mbo3.844</a>                                       |
| <i>A. xylosoxidans</i> | 2.10E-209 | P | 6 | AT699_RS03490 | ABC transporter substrate-binding protein | No  | No  |                                                                                                                                                                         |

**Table S4.** All mutations acquired by lineages in the 7 pathoadaptive genes which were frequently mutated in at least two *Achromobacter* species. Amino acid coordinates are based on the corresponding species' reference genome genes.

| Lineage        | AT699_RS06735/<br>Axylo_RS06040/<br>AL504_RS12625 | AT699_RS22580/<br>Axylo_RS09825/<br>AL504_RS27430     | AT699_RS11865/<br>Axylo_RS17180/<br>AL504_RS06700                                   | AT699_RS03990/<br>Axylo_RS03970/<br>AL504_RS14780 | AT699_RS25090/<br>Axylo_RS21160/<br>AL504_RS25170       | AT699_RS03490/<br>Axylo_RS03480/<br>AL504_RS15290 | AT699_RS01870/<br>Axylo_RS01775/<br>AL504_RS17075 |
|----------------|---------------------------------------------------|-------------------------------------------------------|-------------------------------------------------------------------------------------|---------------------------------------------------|---------------------------------------------------------|---------------------------------------------------|---------------------------------------------------|
| P1903-AX01DK01 |                                                   |                                                       | c.2041G>A,<br>p.Asp681Asn;<br>c.904A>G,<br>p.Thr302Ala;<br>c.472G>A,<br>p.Val158Ile | c.623T>C,<br>p.Val208Ala                          | c.213C>T,<br>p.Asn71Asn                                 |                                                   |                                                   |
| P3403-AX01DK01 | c.7C>T,;<br>p.Arg3Cys                             | c.957G>A,<br>p.Thr319Thr;<br>c.857G>A,<br>p.Arg286His |                                                                                     |                                                   | c.2531C>G,<br>p.Thr844Arg;<br>c.1574A>G,<br>p.His525Arg | c.307T>C,<br>p.Tyr103His                          |                                                   |
| P5303-AX01DK01 |                                                   | c.841G>A,<br>p.Gly281Ser                              | c.1106C>T,<br>p.Thr369Met                                                           | c.937G>A,<br>p.Gly313Ser                          | c.1531A>G,<br>p.Thr511Ala                               |                                                   |                                                   |
| P7703-AX01DK01 |                                                   |                                                       |                                                                                     |                                                   |                                                         |                                                   |                                                   |
| P9503-AX01DK01 |                                                   | c.565G>A,<br>p.Ala189Thr                              | c.188A>G,<br>p.Gln63Arg                                                             | c.1372A>G,<br>p.Thr458Ala;<br>c.1591G>A,          | c.1141A>C,<br>p.Ser381Arg;                              |                                                   |                                                   |

|                    |                                                     |                                                      |                                                                                                                                                |                                                                                                                                                                                 |                           |                                                       |                                                                                  |
|--------------------|-----------------------------------------------------|------------------------------------------------------|------------------------------------------------------------------------------------------------------------------------------------------------|---------------------------------------------------------------------------------------------------------------------------------------------------------------------------------|---------------------------|-------------------------------------------------------|----------------------------------------------------------------------------------|
|                    |                                                     |                                                      |                                                                                                                                                | p.Gly531Ser;<br>c.1594G>A,<br>p.Gly532Ser                                                                                                                                       | c.1117A>G,<br>p.Met373Val |                                                       |                                                                                  |
| P9603-<br>AX01DK01 | c.139G>A,<br>p.Ala47Thr                             | c.745A>G,<br>p.Thr249Ala;<br>c.101C>T,<br>p.Ser34Leu | c.2324A>G,<br>p.Glu775Gly;<br>c.188A>G,<br>p.Gln63Arg                                                                                          | c.1040C>T,<br>p.Ala347Val;<br>c.1391T>C,<br>p.Met464Thr                                                                                                                         | c.2531C>G,<br>p.Thr844Arg |                                                       |                                                                                  |
| P3704-<br>AX01DK01 | c.488A>G,<br>p.Tyr163Cys                            |                                                      |                                                                                                                                                | c.1507C>T,<br>p.Arg503Trp;<br>c.1594G>A,<br>p.Gly532Ser                                                                                                                         |                           |                                                       |                                                                                  |
| P5604-<br>AX01DK01 | c.76T>C,<br>p.Ser26Pro;<br>c.187T>C,<br>p.Cys63Arg  | c.923T>C,<br>p.Val308Ala                             | c.838T>C,<br>p.Tyr280His                                                                                                                       | c.274C>T,<br>p.Pro92Ser;<br>c.740A>G,<br>p.His247Arg                                                                                                                            |                           |                                                       |                                                                                  |
| P1705-<br>AX01DK01 | c.149G>A,<br>p.Gly50Asp                             |                                                      | c.323A>G,<br>p.Gln108Arg                                                                                                                       |                                                                                                                                                                                 | c.1232dupG,<br>p.Trp412fs |                                                       |                                                                                  |
| P0802-<br>AX02DK07 | c.496T>C,<br>p.Ser166Pro;<br>c.35C>T,<br>p.Thr12Ile |                                                      |                                                                                                                                                |                                                                                                                                                                                 | c.1547A>G,<br>p.His516Arg | c.581T>C,<br>p.Leu194Pro                              |                                                                                  |
| P9902-<br>AX02DK06 | c.146A>G,<br>p.Tyr49Cys                             |                                                      | c.3002T>C,<br>p.Ile1001Thr                                                                                                                     |                                                                                                                                                                                 |                           | c.871C>A,<br>p.Arg291Ser                              | c.127A>C,<br>p.Ser43Arg                                                          |
| P0603-<br>AX02DK07 |                                                     |                                                      |                                                                                                                                                |                                                                                                                                                                                 |                           |                                                       | c.619C>T,<br>p.Gln207*                                                           |
| P8504-<br>AX02DK02 |                                                     |                                                      |                                                                                                                                                |                                                                                                                                                                                 |                           |                                                       |                                                                                  |
| P0803-<br>AX03DK06 |                                                     |                                                      |                                                                                                                                                |                                                                                                                                                                                 |                           |                                                       |                                                                                  |
| P1903-<br>AX03DK09 |                                                     |                                                      |                                                                                                                                                |                                                                                                                                                                                 |                           | c.78_80dupGG<br>C, p.Ala27dup                         |                                                                                  |
| P3203-<br>AX03DK11 |                                                     | c.1120G>A,<br>p.Gly374Ser                            | c.173A>G,<br>p.Gln58Arg;<br>c.799C>T,<br>p.Arg267Cys;<br>c.2033A>G,<br>p.Asp678Gly;<br>c.2480A>G,<br>p.Gln827Arg;<br>c.2891A>G,<br>p.His964Arg | c.1069G>A,<br>p.Gly357Ser;<br>c.1208T>C,<br>p.Leu403Pro;<br>c.1283T>C,<br>p.Val428Ala;<br>c.1420A>G,<br>p.Thr474Ala;<br>c.1508G>A,<br>p.Arg503His;<br>c.1557C>T,<br>p.Ile519Ile | c.1141A>C,<br>p.Ser381Arg | c.78_80dupGG<br>C, p.Ala27dup                         | c.26dupG,<br>p.Gly10fs;<br>c.440A>G,<br>p.Tyr147Cys;<br>c.473dupG,<br>p.Asp159fs |
| P4703-<br>AX03DK13 |                                                     | c.633A>C,<br>p.Glu211Asp                             |                                                                                                                                                | c.1430C>A,<br>p.Ala477Asp                                                                                                                                                       |                           |                                                       |                                                                                  |
| P7603-<br>AX03DK16 | c.462_463delG<br>C, p.Leu155fs                      |                                                      |                                                                                                                                                |                                                                                                                                                                                 | c.370C>T,<br>p.Pro124Ser  | c.578G>A,<br>p.Ser193Asn;<br>c.382T>G,<br>p.Phe128Val | c.26dupG,<br>p.Gly10fs                                                           |
| P8603-<br>AX03DK17 |                                                     |                                                      |                                                                                                                                                |                                                                                                                                                                                 |                           |                                                       |                                                                                  |

|                |                            |                      |                       |                                              |                        |  |                           |                     |
|----------------|----------------------------|----------------------|-----------------------|----------------------------------------------|------------------------|--|---------------------------|---------------------|
| P9203-AX03DK18 | c.462_463delGC, p.Leu155fs |                      |                       |                                              |                        |  | c.78_80dupGGC, p.Ala27dup |                     |
| P9403-AX03DK19 | c.508G>A, p.Gly170Ser      |                      | c.490G>A, p.Asp164Asn | c.1594G>A, p.Gly532Ser                       | c.1143C>G, p.Ser381Arg |  |                           |                     |
| P1704-AX03DK21 |                            |                      |                       |                                              |                        |  |                           |                     |
| P3504-AX03DK23 |                            |                      |                       |                                              |                        |  |                           |                     |
| P8404-AX03DK24 |                            |                      |                       |                                              |                        |  | c.78_80dupGGC, p.Ala27dup |                     |
| P8605-AX03DK04 |                            |                      |                       |                                              |                        |  | c.78_80dupGGC, p.Ala27dup |                     |
| P0610-AX03DK27 |                            | c.125G>A, p.Arg42His | c.266C>T, p.Ser89Phe  | c.218A>G, p.Asp73Gly; c.1031T>G, p.Leu344Arg |                        |  |                           | c.26dupG, p.Gly10fs |

**Table S5.** Table of pan-genome, core, accessory and unique genes in *Achromobacter* spp. lineages. Variable genes are separated by whether they were (1) lost or acquired and (2) variable in a group or individually.

| Lineage        | Pan-genome size | Core genome | Accessory genome | Unique genes | Lost genes | Acquired genes | Lost/acquired in group | Lost/acquired individually |
|----------------|-----------------|-------------|------------------|--------------|------------|----------------|------------------------|----------------------------|
| P0802-AX02DK07 | 6299            | 6284        | 15               | 15           | 12         | 3              | 14                     | 1                          |
| P9902-AX02DK06 | 6031            | 5964        | 67               | 26           | 60         | 7              | 61                     | 6                          |
| P0603-AX02DK07 | 6154            | 6081        | 73               | 73           | 24         | 49             | 71                     | 2                          |
| P0803-AX03DK06 | 6377            | 6240        | 137              | 95           | 42         | 95             | 137                    | 0                          |
| P1903-AX01DK01 | 5751            | 5717        | 34               | 34           | 0          | 34             | 34                     | 0                          |
| P1903-AX03DK09 | 6315            | 6230        | 85               | 85           | 83         | 2              | 84                     | 1                          |
| P3203-AX03DK11 | 5733            | 5642        | 91               | 30           | 60         | 31             | 89                     | 2                          |
| P3403-AX01DK01 | 5709            | 5684        | 25               | 25           | 24         | 1              | 23                     | 2                          |
| P4703-AX03DK13 | 5754            | 5587        | 167              | 167          | 156        | 11             | 167                    | 0                          |
| P5303-AX01DK01 | 5732            | 5698        | 34               | 34           | 33         | 1              | 33                     | 1                          |
| P7603-AX03DK16 | 5981            | 5953        | 28               | 22           | 10         | 18             | 28                     | 0                          |
| P7703-AX01DK01 | 5740            | 5708        | 32               | 32           | 16         | 16             | 30                     | 2                          |
| P8603-AX03DK17 | 6065            | 6004        | 61               | 61           | 52         | 9              | 61                     | 0                          |
| P9203-AX03DK18 | 5762            | 5738        | 24               | 24           | 16         | 8              | 23                     | 1                          |
| P9403-AX03DK19 | 5981            | 5945        | 36               | 33           | 6          | 30             | 35                     | 1                          |
| P9503-AX01DK01 | 5855            | 5700        | 155              | 122          | 100        | 55             | 153                    | 2                          |
| P9603-AX01DK01 | 5709            | 5695        | 14               | 12           | 6          | 8              | 13                     | 1                          |
| P1704-AX03DK21 | 5850            | 5812        | 38               | 38           | 36         | 2              | 34                     | 4                          |
| P3504-AX03DK23 | 6139            | 6109        | 30               | 30           | 14         | 16             | 30                     | 0                          |
| P3704-AX01DK01 | 5907            | 5724        | 183              | 128          | 87         | 96             | 181                    | 2                          |
| P5604-AX01DK01 | 5750            | 5725        | 25               | 25           | 23         | 2              | 23                     | 2                          |

|                |      |      |    |    |    |    |    |   |
|----------------|------|------|----|----|----|----|----|---|
| P8404-AX03DK24 | 6230 | 6135 | 95 | 14 | 87 | 8  | 91 | 4 |
| P8504-AX02DK02 | 6129 | 6108 | 21 | 21 | NA | NA | 20 | 1 |
| P1705-AX01DK01 | 5749 | 5714 | 35 | 20 | 4  | 31 | 32 | 3 |
| P8605-AX03DK04 | 5753 | 5708 | 45 | 44 | 3  | 42 | 42 | 3 |
| P0610-AX03DK27 | 5983 | 5910 | 73 | 73 | 69 | 4  | 72 | 1 |

**Table S6.** The most significant genome-wide association study (GWAS) associations (q-value<0.05) and their annotations.

| q-value (comp) | Estimated effect | Reference genome annotation                                                       | COG annotation | Locus tag (A. xylooxidans) | Locus tag (A. insuavis)    | Locus tag (A. ruhlandii)   | Accessory or core genome |
|----------------|------------------|-----------------------------------------------------------------------------------|----------------|----------------------------|----------------------------|----------------------------|--------------------------|
| 2.44E-03       | 1.27/1.33        | outer membrane lipoprotein LolB                                                   | M              | AT699_RS26510              | AL504_RS23260              | Axylo_RS22610              | Accessory                |
| 2.44E-03       | 1.33             | radical SAM protein                                                               | C              | AT699_RS17605              | AL504_RS00905              | Axylo_RS12770              | Accessory                |
| 3.53E-03       | -0.97/1.11       | pyruvate, phosphate dikinase                                                      | G              | AT699_RS11685              | AL504_RS06890              | Axylo_RS17375              | Core                     |
| 5.99E-03       | 1.04             | ABC transporter substrate-binding protein                                         | P              | AT699_RS00340              | AL504_RS19000              | Axylo_RS00350              | Core                     |
| 8.45E-03       | 1.65             | aminoacyl-tRNA hydrolase                                                          | J              | AT699_RS12635              | AL504_RS05565              | Axylo_RS13300              | Accessory                |
| 1.06E-02       | 1.04             | ABC transporter ATP-binding protein                                               | P              | AT699_RS10200              | AL504_RS08485              | Axylo_RS18875              | Core                     |
| 1.06E-02       | 1.24             | radical SAM protein                                                               | C              | AT699_RS17605              | AL504_RS00905              | Axylo_RS12770              | Accessory                |
| 1.06E-02       | 1.28             | MFS transporter                                                                   | EGP            | AT699_RS21015              | AL504_RS28990              |                            | Core                     |
| 1.06E-02       | -1.41            | TetR/AcrR family transcriptional regulator                                        | K              | AT699_RS11830              | AL504_RS06735              | Axylo_RS17215              | Accessory                |
| 2.85E-02       | -1.05/1.11       | DotU family type IV/VI secretion system protein                                   | N              | AT699_RS16150              | AL504_RS01895              |                            | Core                     |
| 8.45E-06       | 1.41             | TonB-dependent siderophore receptor; amino acid ABC transporter substrate-binding | P              | AT699_RS06625              |                            | Axylo_RS05930              | Accessory                |
| 6.60E-05       | 1.37             | Putative hydrolase/carboxylic esterase                                            | S              | AT699_RS00630              | AL504_RS18635              | Axylo_RS00580              | Core                     |
| 6.69E-05       | 1.37             | organic hydroperoxide resistance protein                                          | O              | AT699_RS22585              | AL504_RS27425              | Axylo_RS09820              | Core                     |
| 6.69E-05       | 1.37             | DNA mismatch repair protein MutS                                                  | L              | AT699_RS22150              | AL504_RS27775              | Axylo_RS10195              | Accessory                |
| 6.69E-05       | 1.37             | Transcriptional regulator, AraC family                                            | K              | AT699_RS03405              | AL504_RS15545              | Axylo_RS03205              | Core                     |
| 6.69E-05       | 1.37             | LysR family transcriptional regulator                                             | K              | AT699_RS11620 <sup>a</sup> | AL504_RS06955 <sup>a</sup> | Axylo_RS17440 <sup>a</sup> | Core                     |
| 6.69E-05       | -0.94            | ATP-dependent RNA helicase                                                        | JKL            | AT699_RS29520              | AL504_RS20735              | Axylo_RS25200              | Accessory                |

|          |       |                                                                              |   |                        |                        |                        |           |
|----------|-------|------------------------------------------------------------------------------|---|------------------------|------------------------|------------------------|-----------|
| 1.33E-04 | 1.65  | multidrug efflux RND transporter permease AxyY                               | V | AT699_RS06725          | AL504_RS12635          | Axylo_RS06030          | Core      |
| 1.33E-04 | 1.36  | multidrug transporter subunit MdtB                                           | V | AT699_RS02790          | AL504_RS16140          | Axylo_RS02585          | Core      |
| 1.33E-04 | 1.33  | Filamentous hemagglutinin; pseudogene                                        | - | AT699_RS29505          | AL504_RS11560          | Axylo_RS25185          |           |
| 2.24E-02 | 1.5   | amine dehydrogenase                                                          | C | AT699_RS09615          | AL504_RS09355          | Axylo_RS19475          | Core      |
| 2.24E-02 | 1.48  | multidrug efflux RND transporter permease AxyY                               | V | AT699_RS06725          | AL504_RS12635          | Axylo_RS06030          | Core      |
| 2.24E-02 | 1.47  | hypothetical protein                                                         | P | AT699_RS06895          | AL504_RS12460          | Axylo_RS06195          | Accessory |
| 2.24E-02 | 1.47  | Acyl-CoA dehydrogenase                                                       | I | Uniprot ID: A0A1D8I881 | Uniprot ID: A0A1D8I881 | Uniprot ID: A0A1D8I881 | Accessory |
| 2.38E-02 | 1.39  | TonB-dependent siderophore receptor                                          | P | AT699_RS21215          | AL504_RS28745          |                        | Accessory |
| 2.38E-02 | 1.38  | FUSC family protein                                                          | S | AT699_RS15550          | AL504_RS05585          | Axylo_RS13280          | Core      |
| 2.38E-02 | 1.39  | NADH-quinone oxidoreductase subunit G                                        | C | AT699_RS06820          | AL504_RS12540          | Axylo_RS06125          | Core      |
| 2.38E-02 | 1.40  | AraC family transcriptional regulator                                        | K | AT699_RS22495          | AL504_RS27515          | Axylo_RS09915          | Core      |
| 2.38E-02 | 1.39  | TonB-dependent siderophore receptor                                          | P | AT699_RS21215          | AL504_RS28745          |                        | Accessory |
| 2.38E-02 | 1.39  | murein transglycosylase                                                      | M | AT699_RS01840          | AL504_RS17105          | Axylo_RS01745          | Core      |
| 3.95E-03 | 1.29  | DUF2809 domain-containing protein                                            | S | AT699_RS01515          | AL504_RS17430          | Axylo_RS01515          | Accessory |
| 3.95E-03 | 1.31  | AraC family transcriptional regulator; GlxA family transcriptional regulator | K | AT699_RS19725          | AL504_RS30075          | Axylo_RS11170          | Accessory |
| 3.95E-03 | 1.33  | endolytic transglycosylase MltG                                              | S | AT699_RS12475          | AL504_RS02235          | Axylo_RS16545          | Accessory |
| 3.95E-03 | 1.13  | AraC family transcriptional regulator                                        | K | AT699_RS22495          | AL504_RS27515          | Axylo_RS09915          | Core      |
| 3.95E-03 | -1.04 | branched-chain amino acid ABC transporter permease                           | U | AT699_RS04800          | AL504_RS13950          | Axylo_RS04730          | Core      |
| 4.39E-03 | 1.22  | hypothetical protein                                                         | S | AT699_RS00475          |                        | Axylo_RS00495          | Accessory |
| 4.39E-03 | 1.22  | Putative manganese efflux pump MntP                                          | P |                        | AL504_RS27680          | Axylo_RS10100          | Accessory |
| 4.39E-03 | 1.12  | N-carbamoylsarcosine amidase                                                 | Q | AT699_RS16385          | AL504_RS01610          |                        | Core      |
| 4.39E-03 | 1.16  | type I secretion system permease/ATPase                                      | P | AT699_RS27360          | AL504_RS22385          | Axylo_RS23340          | Accessory |
| 4.96E-03 | 1.13  | MarR family transcriptional regulator                                        | K | AT699_RS26215          | AL504_RS23535          | Axylo_RS22350          | Accessory |
| 6.66E-03 | 1.38  | 16S rRNA                                                                     | J | AT699_RS04335          | AL504_RS14405          | Axylo_RS04330          | Core      |

|          |             |                                             |    |               |               |               |           |
|----------|-------------|---------------------------------------------|----|---------------|---------------|---------------|-----------|
| 6.66E-03 | 1.38        | protein-disulfide reductase DsbD            | CO | AT699_RS30205 | AL504_RS20050 | Axylo_RS25815 | Core      |
| 6.66E-03 | 1.38        | iron ABC transporter permease               | P  | AT699_RS13445 | AL504_RS04765 | Axylo_RS14080 | Core      |
| 9.89E-03 | 1.38        | TonB-dependent siderophore receptor         | P  | AT699_RS21215 | AL504_RS28745 |               | Accessory |
| 9.89E-03 | 1.38        | FUSC family protein                         | S  |               | AL504_RS30540 | Axylo_RS11620 | Accessory |
| 9.89E-03 | 1.38        | LD-carboxypeptidase                         | V  | AT699_RS14215 | AL504_RS03960 | Axylo_RS14760 | Accessory |
| 9.89E-03 | 1.38        | NADH-quinone oxidoreductase subunit G       | C  | AT699_RS06820 | AL504_RS12540 | Axylo_RS06125 | Core      |
| 9.89E-03 | -1.28/1.38  | murein transglycosylase                     | M  | AT699_RS01840 | AL504_RS17105 | Axylo_RS01745 | Core      |
| 9.89E-03 | 1.38        | imidazolonepropionase                       | Q  | AT699_RS01460 | AL504_RS17485 | Axylo_RS01460 | Accessory |
| 9.89E-03 | 1.38        | Ferrichrome receptor FcuA                   | P  | AT699_RS21215 | AL504_RS28745 |               | Accessory |
| 1.32E-02 | -1.22/1.49  | ABC transporter ATP-binding protein         | V  | AT699_RS21650 | AL504_RS28325 | Axylo_RS10590 | Core      |
| 1.32E-02 | -1.23       | uracil-DNA glycosylase                      | L  | AT699_RS06925 | AL504_RS12430 | Axylo_RS06225 | Accessory |
| 1.32E-02 | 1.36        | GNAT family N-acetyltransferase             | J  |               |               | Axylo_RS23215 | Accessory |
| 1.32E-02 | -1.23       | VgrG protein; type IV secretion protein Rhs | S  | AT699_RS16180 |               | Axylo_RS14380 | Accessory |
| 2.51E-02 | 1.24        | 16S rRNA                                    | J  | AT699_RS04335 | AL504_RS14405 | Axylo_RS04330 | Core      |
| 2.51E-02 | -1.30       | glutamate carboxypeptidase                  | E  | AT699_RS13095 | AL504_RS05100 | Axylo_RS13750 | Accessory |
| 2.51E-02 | 1.30        | endolytic transglycosylase MltG             | S  | AT699_RS12475 | AL504_RS02235 | Axylo_RS16545 | Accessory |
| 2.51E-02 | 1.12        | TonB-dependent siderophore receptor         | P  |               | AL504_RS00915 | Axylo_RS12780 | Accessory |
| 2.51E-02 | -1.21       | 50S ribosomal protein L3 N(5)-glutamine     | J  | AT699_RS19080 | AL504_RS30750 | Axylo_RS11810 | Core      |
| 2.51E-02 | -1.11/-1.18 | NADH-quinone oxidoreductase subunit NuoH    | C  | AT699_RS06825 | AL504_RS12535 | Axylo_RS06130 | Core      |

<sup>a</sup> Pathoadaptive gene

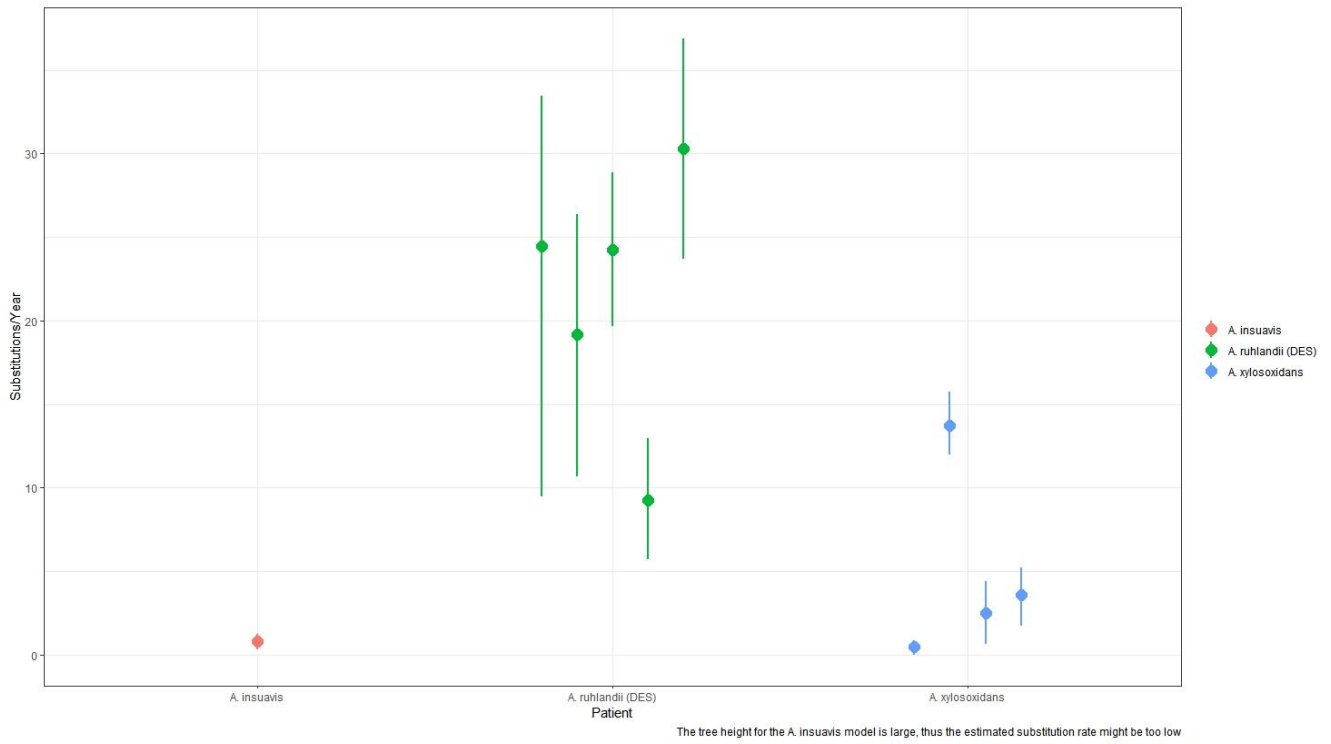

**Figure S1.** Substitution rate per year average with 95% confidence intervals for *Achromobacter insuavis*, *Achromobacter ruhlandii* (Danish epidemic strain (DES)) and *Achromobacter xylosoxidans*.



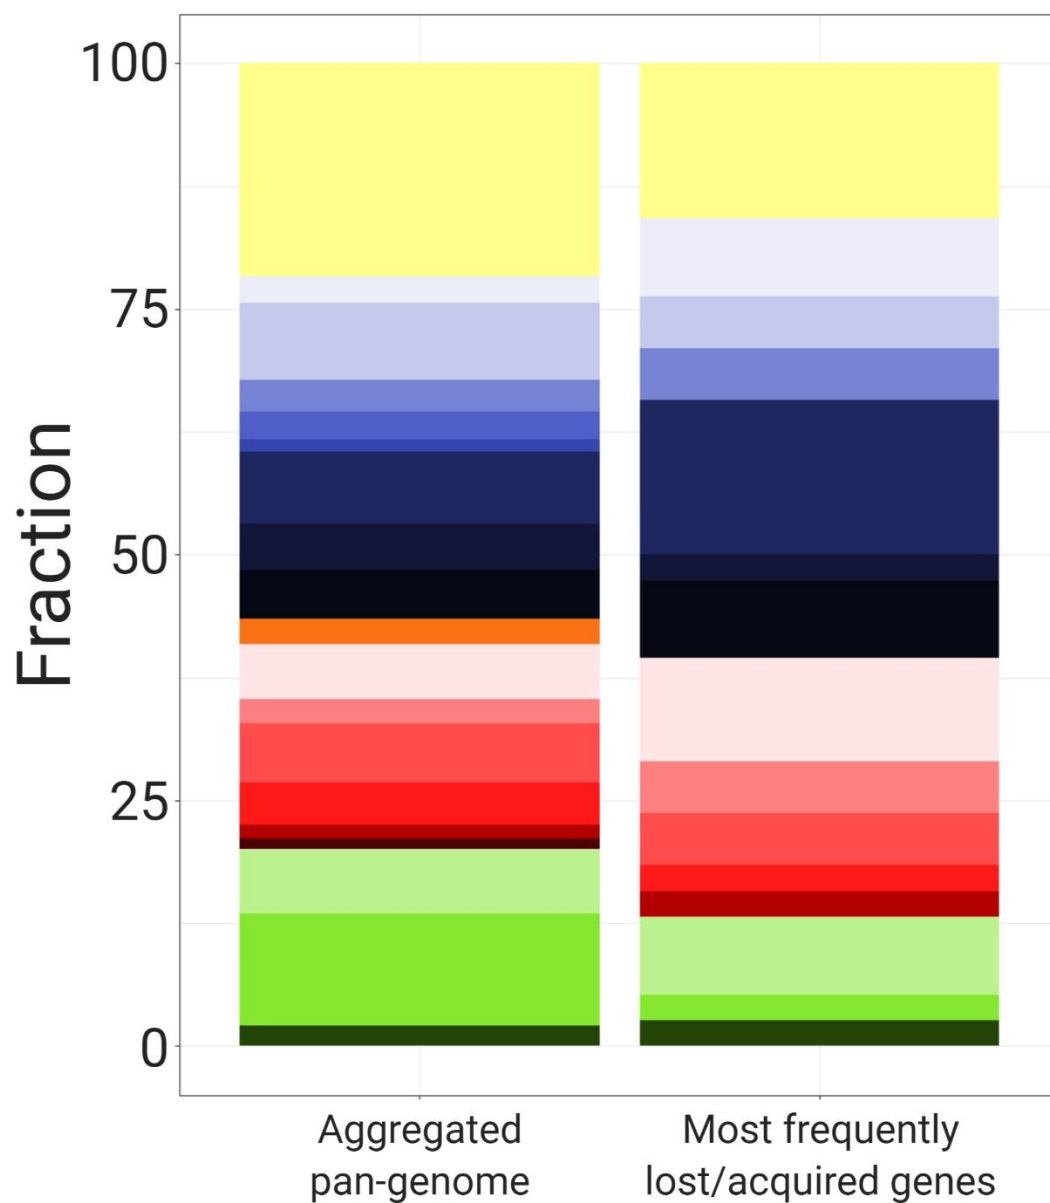

### COG function

- |                                                                  |                                                                  |                                                     |
|------------------------------------------------------------------|------------------------------------------------------------------|-----------------------------------------------------|
| [S] Function unknown                                             | [O] Posttranslational modification, protein turnover, chaperones | [B] Chromatin structure and dynamics                |
| [Q] Secondary metabolites biosynthesis, transport and catabolism | [U] Intracellular trafficking, secretion and vesicular transport | [L] Replication, recombination and repair           |
| [P] Inorganic ion transport and metabolism                       | [W] Extracellular structures                                     | [K] Transcription                                   |
| [I] Lipid transport and metabolism                               | [N] Cell motility                                                | [A] RNA processing and modification                 |
| [H] Coenzyme transport and metabolism                            | [M] Cell wall/membrane/envelope biogenesis                       | [J] Translation, ribosomal structure and biogenesis |
| [F] Nucleotide transport and metabolism                          | [T] Signal transduction mechanisms                               |                                                     |
| [E] Amino acid transport and metabolism                          | [V] Defense mechanism                                            |                                                     |
| [G] Carbohydrate transport and metabolism                        | [D] Cell cycle control, cell division, chromosome partitioning   |                                                     |
| [C] Energy production and conversion                             |                                                                  |                                                     |

**Figure S2.** Clusters of Orthologous Groups (COG) annotation of the aggregated pan-genome and most frequently lost or acquired genes.

**Text S1.** *Achromobacter* spp. gene presence-absence analysis results.

As a crucial part of bacterial adaptation and evolution, we investigated the most frequently lost and acquired genes in the 26 longitudinally sampled *Achromobacter* spp. lineages. First, *de novo* assembled genomes were annotated using Prokka version 1.12 [3] with the settings of a minimum contig length of 200 nucleotides and using a manually created annotation database for *Achromobacter* spp. (GCF\_001051055.1 (*A. ruhlandii*), GCF\_001558755.2 (*A. insuavis*) and GCF\_001457475.1) (*A. xylosoxidans*). Further analysis was based on longitudinal lineages by GenAPI software with default settings. [4] Genes shorter than 150 nucleotides were excluded from further analysis by default. We defined a gene as lost if it was present in the first isolate but absent in one or more of the later isolates and a gene was defined as acquired if it was absent in the first isolate but present in one or more of the later isolates. The lineage pan-genomes contained on average 5,940 (5,709–6,377) genes of which on average 62 (14–183) were lost or acquired. In total, we found 1,464 genes to be variable within lineages and 735 of these were unique to a single lineage in the aggregated pan-genome (Figure 2B). We observed that genes were 2 times more often lost than acquired and lost/acquired in groups 37 times more commonly than individually (Table S5).

Most frequently lost or acquired genes were defined if a gene was lost/acquired in a minimum of 3 lineages. In total, 38 genes passed these criteria; however, after the manual inspection, one gene was defined as a false positive: the gene was manually assessed as present, yet the gene was not assembled with a minimum requirement of 25% of the gene length coverage, thus was predicted to be absent by GenAPI. The remaining 37 genes that were frequently lost or acquired, were annotated with EGGNOG-mapper: transport and metabolism genes were more frequently lost/acquired, especially amino acid transport and metabolism genes, when compared to the composition of the aggregated pan-genome. Contrary, structural, cellular organization and cell cycle genes; reproduction; and gene expression regulating genes were less frequently lost/acquired (Figure S2).

## References

- [1] Ridderberg W, Jensen Handberg K, Nørskov-Lauritsen N. Prevalence of hypermutator isolates of *Achromobacter* spp. from cystic fibrosis patients. *Int J Med Microbiol.* 2020 Jan 16;151393.

- [2] Gabrielaite M, Bartell JA, Nørskov-Lauritsen N, Pressler T, Nielsen FC, Johansen HK, et al. Transmission and antibiotic resistance of *Achromobacter* in cystic fibrosis. *J Clin Microbiol*. 2021 Jan 20.
- [3] Seemann T. Prokka: rapid prokaryotic genome annotation. *Bioinformatics*. 2014 Jul 15;30(14):2068–9.
- [4] Gabrielaite M, Marvig RL. GenAPI: a tool for gene absence-presence identification in fragmented bacterial genome sequences. *BMC Bioinformatics*. 2020 Jul 20;21(1):320.
